# Supplementary material for: Plasma neutrophil gelatinase-associated lipocalin in acute kidney injury superimposed on chronic kidney disease after cardiac surgery: a multicenter prospective study
Source: PubMed Central journal article supplement (PMC4056897; doi:10.1186/cc13104), 2013-11-12
Supplement: cc13104-S3.pdf [file cc13104-S3.pdf]

**A**

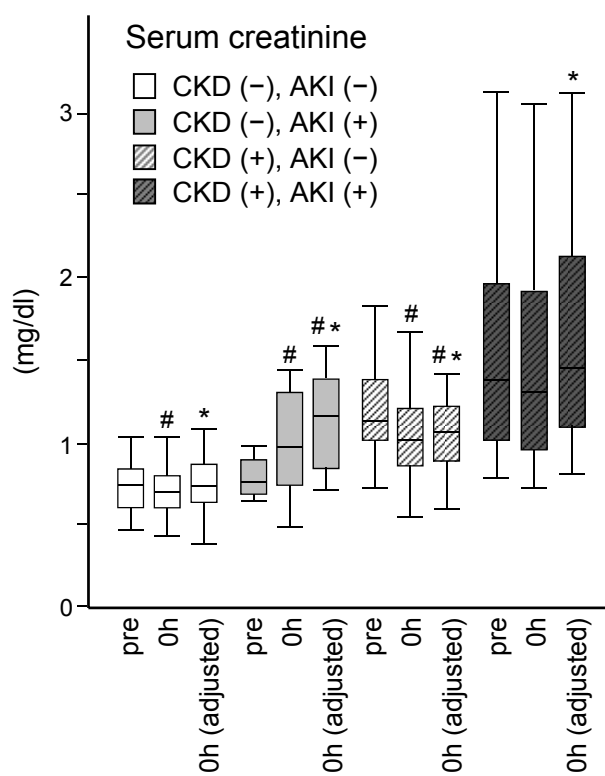

**B**

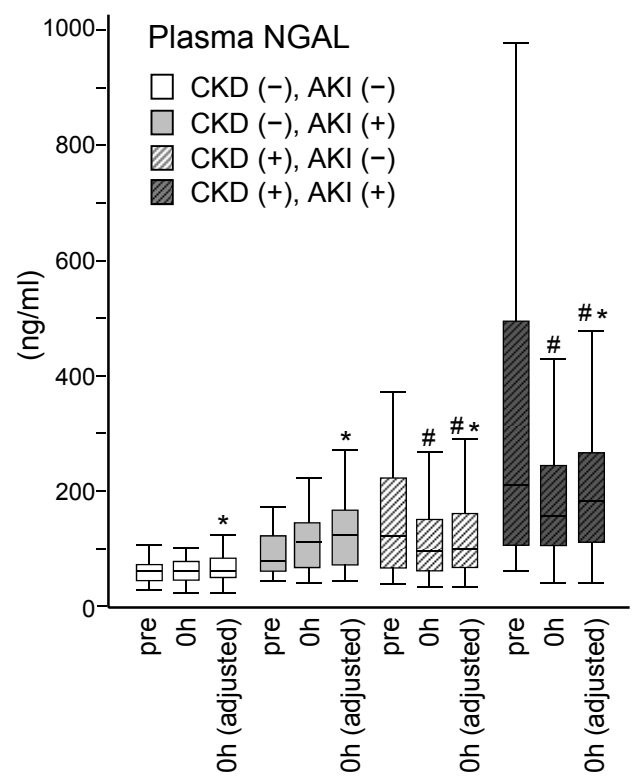

Supplementary figure 3
